# Growing Season Carbon Dioxide Exchange in Flooded Non-Mulching and Non-Flooded Mulching Cotton

Zhi-guo Li<sup>1,2</sup>, Run-hua Zhang<sup>3</sup>, Xiu-jun Wang<sup>1</sup>, Fang Chen<sup>2</sup>, Chang-yan Tian<sup>1\*</sup>

**1** State Key Laboratory of Desert and Oasis Ecology, Xinjiang Institute of Ecology and Geography, Chinese Academy of Sciences, Urumqi, China, **2** Wuhan Botanical Garden, Chinese Academy of Sciences Key Laboratory of Aquatic Botany and Watershed Ecology, Chinese Academy of Sciences, Wuhan, China, **3** Wuhan Vegetable Research Institute, Wuhan, China

## Abstract

There is much interest in the role that agricultural practices might play in sequestering carbon to help offset rising atmospheric CO<sub>2</sub> concentrations. However, limited information exists regarding the potential for increased carbon sequestration of different management strategies. The objective of this study was to quantify and contrast carbon dioxide exchange in traditional non-mulching with flooding irrigation (TF) and plastic film mulching with drip irrigation (PM) cotton (*Gossypium hirsutum* L.) fields in northwest China. Net primary productivity (*NPP*), soil heterotrophic respiration (*R<sub>h</sub>*) and net ecosystem productivity (*NEP*) were measured during the growing seasons in 2009 and 2010. As compared with TF, PM significantly increased the aboveground and belowground biomass and the *NPP* (340 g C m<sup>-2</sup> season<sup>-1</sup>) of cotton, and decreased the *R<sub>h</sub>* (89 g C m<sup>-2</sup> season<sup>-1</sup>) (*p* < 0.05). In a growing season, PM had a higher carbon sequestration in terms of *NEP* of ~ 429 g C m<sup>-2</sup> season<sup>-1</sup> than the TF. These results demonstrate that conversion of this type of land use to mulching practices is an effective way to increase carbon sequestration in the short term in cotton systems of arid areas.

**Citation:** Li Z-g, Zhang R-h, Wang X-j, Chen F, Tian C-y (2012) Growing Season Carbon Dioxide Exchange in Flooded Non-Mulching and Non-Flooded Mulching Cotton. PLoS ONE 7(11): e50760. doi:10.1371/journal.pone.0050760

**Editor:** Ben Bond-Lamberty, DOE Pacific Northwest National Laboratory, United States of America

**Received:** August 27, 2012; **Accepted:** October 26, 2012; **Published:** November 30, 2012

**Copyright:** © 2012 Li et al. This is an open-access article distributed under the terms of the Creative Commons Attribution License, which permits unrestricted use, distribution, and reproduction in any medium, provided the original author and source are credited.

**Funding:** This study was financially supported by the project of National Natural Science Foundation of China (40971048) and the program for 100 Distinguished Young Scientists of the Chinese Academy of Sciences (0972021001). The funders had no role in study design, data collection and analysis, decision to publish, or preparation of the manuscript.

**Competing Interests:** The authors have declared that no competing interests exist.

\* E-mail: tianchy@ms.xjb.ac.cn

## Introduction

Management and policies to increase the carbon (C) sink of agricultural soils have gained more and more attention, and it can be accepted as one of the greatest potential methods to sequester C in terrestrial ecosystems [1,2]. Different agronomic practices have been evaluated and recommended to reduce CO<sub>2</sub> emissions and increase C in soils such as the elimination of tillage, continuous cropping, cover cropping, using legumes in rotation and manure and crop residue application [3–5]. For example, Sperow *et al.* [6] suggested that a change from conventional tillage to no-tillage on all currently annually cropped areas (129 Mha) in the United States could result in 47 Tg C sequestered annually. Vleeshouwers and Verhagen [7] identified animal manure incorporation and the use of straw (or crop residues) could sequester as much as 0.19 and 0.15 Mg C ha<sup>-1</sup> yr<sup>-1</sup>, respectively. Although several studies have advanced the notion that changes in soil C stocks are associated with changes in crop management or in land use [1], there is still a lack of information regarding the potential C sequestration resulting from the conversion from traditional non-mulching cultivation to mulching cultivation [8].

Recently, newer cultivation technologies incorporating mulching with plastic film together with drip irrigation (PM) have been shown to increase soil temperatures and conserve soil moisture [9,10], resulting in increased crop production. PM cultivation is now widely applied in China [11,12] with land areas of this type of cultivation reaching 1,000,000 ha in northwestern China in 2009 [13]. It has replaced traditional cultivation (TF) involving flood

irrigation with no mulching, which was the main cropping system used in dry land agriculture in northwest China before 1980 [12]. These large land use changes alter the soil microenvironment and have significant effects on the C balance of agro-ecosystems [1]. Understanding the extent to which the conversion of TF to PM contributes to the C cycle is important for developing C management strategies in dry land areas of China.

At present, there are few studies where a complete ecosystem approach (net ecosystem productivity [*NEP*], net primary productivity [*NPP*] and soil heterotrophic respiration [*R<sub>h</sub>*]) is used to compare the C fluxes in traditional and modern cultivations of agro-ecosystems. In this study, a full C balance approach was used to investigate short-term effects (2 years) of cotton (*Gossypium hirsutum* L.) conversion from TF to PM on *NEP*. This study aims to quantify and contrast the amount of C sequestered by the plant biomass and the C lost through soil respiration in PM and TF cotton fields, and to estimate the net gains/losses of C due to the conversion of PM to TF in dry land cotton fields.

## Materials and Methods

### 2.1. Site Description

The study site was located at the Fukang Station of Desert Ecology (87° 56' E, 44° 17' N) of the Chinese Academy of Sciences at an elevation of 461 m [14]. The soil type is a clay loam with a bulk density of 1.56 g cm<sup>-3</sup>. Values of pH, electrical conductivity and total organic carbon at 0–10 cm are 8.42, 2.08 ms cm<sup>-1</sup> and 5.64 mg C g<sup>-1</sup>, respectively. In 2009 and 2010,

daily mean air pressures ranged from 922.9 to 996.3 hPa. The daily mean air temperature had a maximum of 32°C, a minimum of -21°C, and a mean of 9.28°C. Daily mean air relative humidity showed large fluctuations, varying from 27.2 to 100%. Total annual precipitation was 164.2 mm in 2009 and 166.2 mm in 2010, slightly higher than the long-term average of 160 mm for the last 30 years.

## 2.2. Field Experiment

The field site has been reclaimed for 15 years from desert, and has been continuously planted cotton under plastic film mulching cultivation. In this field, we designed two treatments during the cotton growing seasons of 2009 and 2010: (1) the traditional cultivation system (TF) of flood irrigation with no mulching; and (2) a modern cultivation system using plastic film mulching with drip irrigation (PM). Each treatment was replicated three times in a randomized complete block design using plots 15×8 m. The cotton seeds (C.V. Xinluzao No. 6) were sown on April 21, 2009, and April 28, 2010. For the PM treatment, a high density and airtight transparent polythene film (0.01–0.02 mm thick, 1.25 m wide) was placed over the soil surface before sowing. The seeder made small holes (0.02×0.02 m) at 0.1 m intervals within a row in the plastic film and seeds were placed into the holes, and then each hole was covered with soil. Four rows were sown on each strip of plastic film. For the TF treatment, the plants were sown as for the PM treatment. For both treatments the planting density was 266 667 plants ha<sup>-1</sup>. Irrigation models were used: drip irrigation under mulching for the PM treatment and flooded irrigation for the TF treatment, and the timing of irrigation and its volume followed the local commercial practice. Nitrogen fertilizer (110 kg N ha<sup>-1</sup>) and phosphorus fertilizer (72 kg P<sub>2</sub>O<sub>5</sub> ha<sup>-1</sup>) were applied to both treatments, and weeds were controlled by hand.

## 2.3. Microclimate

During the growing season of 2009 and 2010, measurements of air temperature at 30 cm and soil temperature at 10 cm in planted sites and non planted sites with and without chambers, were made for each sample by using a SN2202 digital thermo detector (Sinan Instruments Plant of Beijing Normal University, Beijing). At the same time, soil water content at 10 cm in each plot was measured with the oven drying method (105°C for 48 h).

## 2.4. Growth Analysis

From May 10 to October 20 in 2009 and 2010, five 50×50 cm quadrats were randomly selected from both the PM and the TF every 25 days after planting. The above ground biomass in each quadrat was clipped to ground level and put in large brown paper bags. The below ground biomass was determined by the excavation of 50×50 cm pits at the same time to a depth of 70 cm in 20 cm increments. The live below ground biomass in each quadrat was collected and put in large brown paper bags. Biomass samples were washed in a series of five de-ionized water baths and weighed after oven drying for 5 days at 75°C. Grain yield, for each plot, was determined on three 4-m<sup>2</sup> subplots. Organic C was measured by oxidation with K<sub>2</sub>CrO<sub>7</sub> according to the method of Liu *et al.* [15].

## 2.5. Net Primary Productivity

In this study, the cotton *NPP* was calculated by the measurement of above and below ground biomass during the different cotton periods and the C content using the following equation:

$$NPP_i = (Bb_i - Bb_{i-1}) \times Cb + (Ba_i - Ba_{i-1}) \times Ca \quad (1)$$

where *i* is the measurement time of the plant biomass, *Bb* is the below ground biomass (g m<sup>-2</sup>), *Cb* (g C g<sup>-1</sup>) is the carbon content of the below ground biomass, *Ba* is the above ground biomass (g m<sup>-2</sup>), *Ca* (g C g<sup>-1</sup>) is the carbon content of the above ground biomass.

## 2.6. Soil Heterotrophic Respiration (R<sub>h</sub>) Measurements

Soil heterotrophic respiration was measured at midday using a closed opaque chamber (0.5×0.5×0.5 m), which has been a method used in previous studies [16,17]. The chamber was equipped with a small circulation fan and a gas channel, which was a PVC tube with a three-way stopcock. A stainless steel frame with a water groove (0.5×0.5×0.05 m) was inserted into the soils, and the chamber was put into a groove that was filled with water before each gas sampling to ensure an airtight seal.

Three steel frames were placed between cotton rows in each replicate. Nylon nets (200 cm long×50 cm height, mesh size 0.25 mm) were buried around the frame to prevent roots entering the soil below the frames. When conducting gas sampling, the gas was collected mostly between 9 and 11 am every other week. The fluxes measured during this time in the morning are regarded to be basically representative for the daily average fluxes [18,19]. About 70 mL of gas was aspirated from the chamber at 30-s intervals for 150 s after capping. Gas samples were collected in polyethylene coated aluminum gas bags and taken into the laboratory soon after sampling. CO<sub>2</sub> concentrations were analyzed using a modified gas chromatograph (Agilent 4890D) equipped with an electron capture detector and a hydrogen flame ionization detector. The flux of soil heterotrophic respiration was calculated as follows:

$$F = \rho \times V/A \times \Delta c/\Delta t \times 273/T \times \alpha \quad (2)$$

where *F* (g C m<sup>-2</sup> h<sup>-1</sup>) refers to flux of soil heterotrophic respiration, *ρ* is the density of CO<sub>2</sub> (1.98×10<sup>3</sup> g m<sup>-3</sup>) under standard conditions, *V* (m<sup>3</sup>) and *A* (m<sup>2</sup>) are the volume and bottom area of the chamber, *Δc* (m<sup>3</sup> m<sup>-3</sup>) is the change in CO<sub>2</sub> concentration in the chamber during the period *Δt* (h), *T* is the absolute temperature and *α* is the conversion factor for CO<sub>2</sub> to C (12/44).

## 2.7. Growing Season Net Ecosystem Productivity (NEP) Measurements

*NEP* is a comprehensive measure of net carbon accumulation by ecosystems. Growing season *NEP* can be calculated as the difference between the season *NPP* and season *R<sub>h</sub>*:

$$\begin{aligned} \text{season}NEP &= \text{season}NPP - \text{season}R_h \\ &= \sum_i^n NPP_i - \sum_j^n \frac{X_j + X_{j+1}}{2} (t_{j+1} - t_j) \end{aligned} \quad (3)$$

where season *R<sub>h</sub>* represent cumulative soil CO<sub>2</sub> emissions throughout the cotton growing season; *i* and *j* are the measurement times of the plant biomass and soil respiration; *X<sub>j</sub>* (g C m<sup>-2</sup> d<sup>-1</sup>) is the first week CO<sub>2</sub> measurement and *X<sub>j+1</sub>* (g C m<sup>-2</sup> d<sup>-1</sup>) is the following week CO<sub>2</sub> measurement at times *t<sub>j</sub>* and *t<sub>j+1</sub>*, respectively; and *n* is the final week of CO<sub>2</sub> measurement during the experiment periods.

## 2.8 Statistical Analysis

Data comparisons between PM and TF sites were performed by one-way ANOVA using SPSS 11.0 software. Averages from all

treatments were compared using Fisher's least significant difference at a probability level of 0.05.

## Results

### 3.1. Soil Temperature and Soil Water Content

The mean daily soil temperature showed a marked seasonal trend during the growing season for all years and all sites, and both PM and TF had higher mean annual values in 2010 than in 2009 (Fig. 1). Soil temperature in the PM was significantly higher than in TF during the early growing season (April to July) ( $p < 0.05$ ); however, at the mid-late growth stage (after August), the daily average temperature in PM was obviously lower than that in TF, particularly in 2010. Soil water contents for PM and TF were also higher in 2010 than in 2009 during the growing period. The PM had a significant higher soil water content during the growing period than the TC treatment ( $p < 0.05$ ), but the difference was larger in 2009 than 2010.

### 3.2. NPP

Daily *NPP* values relative to the whole growing period (April to November) were computed for both land uses. The time series graphs of *NPP* from PM and TF (Fig. 2) showed large fluctuations ranging from 0.17 to 15.12 g C m<sup>-2</sup> d<sup>-1</sup> during the whole growing period. *NPP* increased to the highest levels in July and August but remained at a low level during the early (May–July) and late (October) growing season. Overall, the average daily rates of *NPP* in the PM were significantly higher than in the TF, especially during the main growth periods where PM (15.12 g C m<sup>-2</sup> d<sup>-1</sup>) was approximately 1.5 times higher than TF (9.4 g C m<sup>-2</sup> d<sup>-1</sup>) ( $p < 0.05$ ). Total *NPP* for the PM during the whole growing season was 1030 g C m<sup>-2</sup> season<sup>-1</sup> which was significantly higher than the 689 g C m<sup>-2</sup> season<sup>-1</sup> for the TF (Table 1) ( $p < 0.001$ ). In the 2nd year of measurement (2010), total *NPP* on both the PM and PF sites was less than the 1st year (2009) probably because an insect pest infestation broke out during the main cotton growing period (July). However, PM did show a higher total *NPP* than TF, although the difference was smaller.

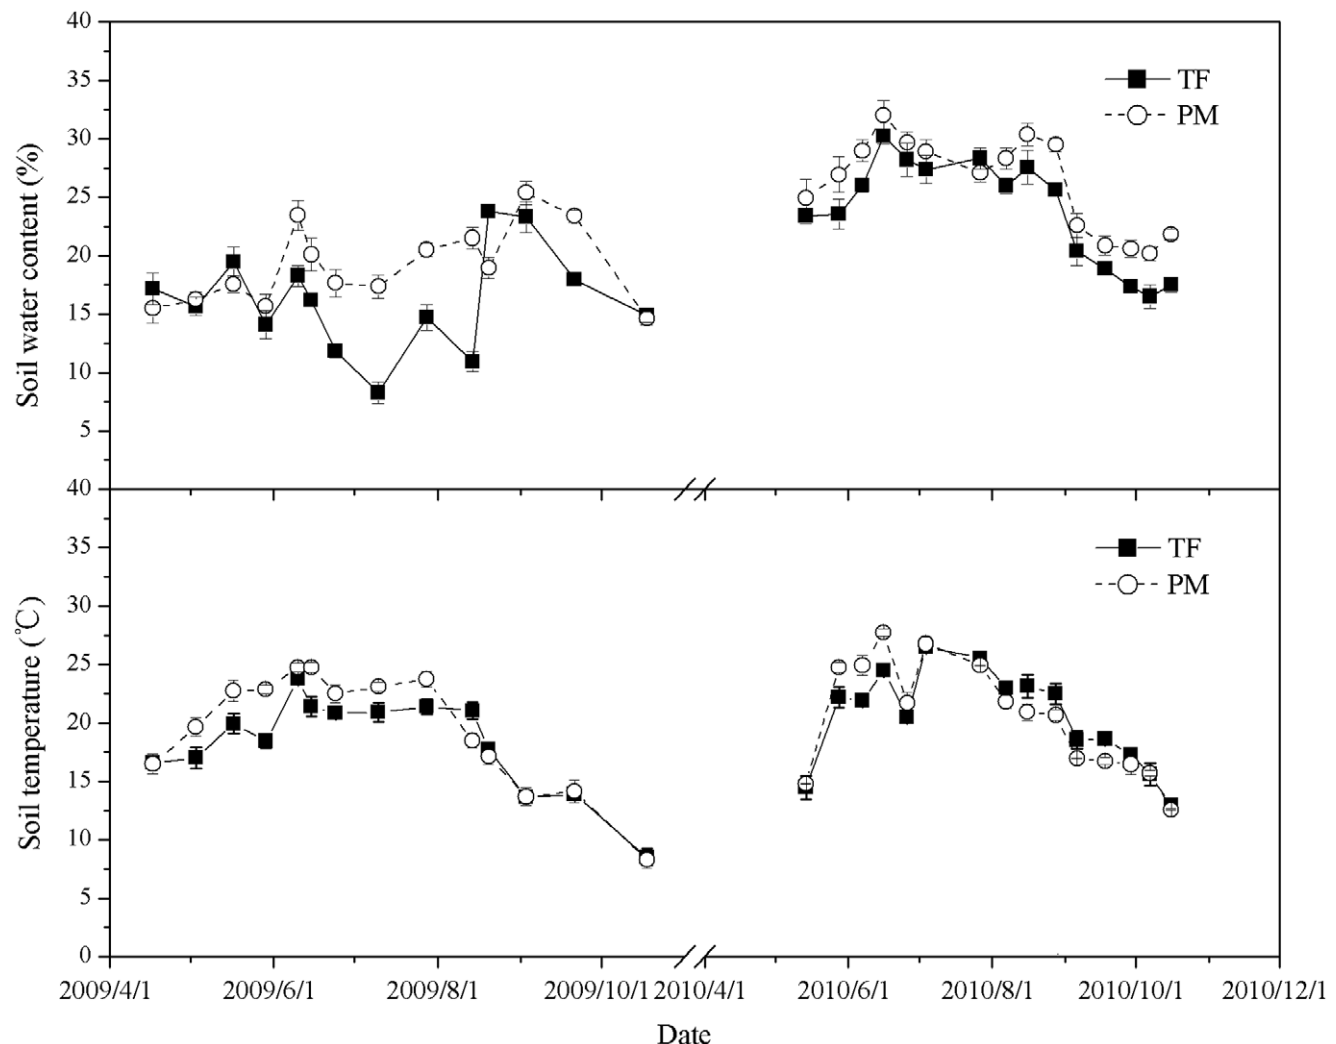

**Figure 1. Soil temperature and soil water content measured at 10 cm depth in the traditional cultivation system of flood irrigation with no mulching (TF) and the modern cultivation system using plastic film mulching with drip irrigation (PM) in the cotton growing season of 2009 and 2010.**

doi:10.1371/journal.pone.0050760.g001

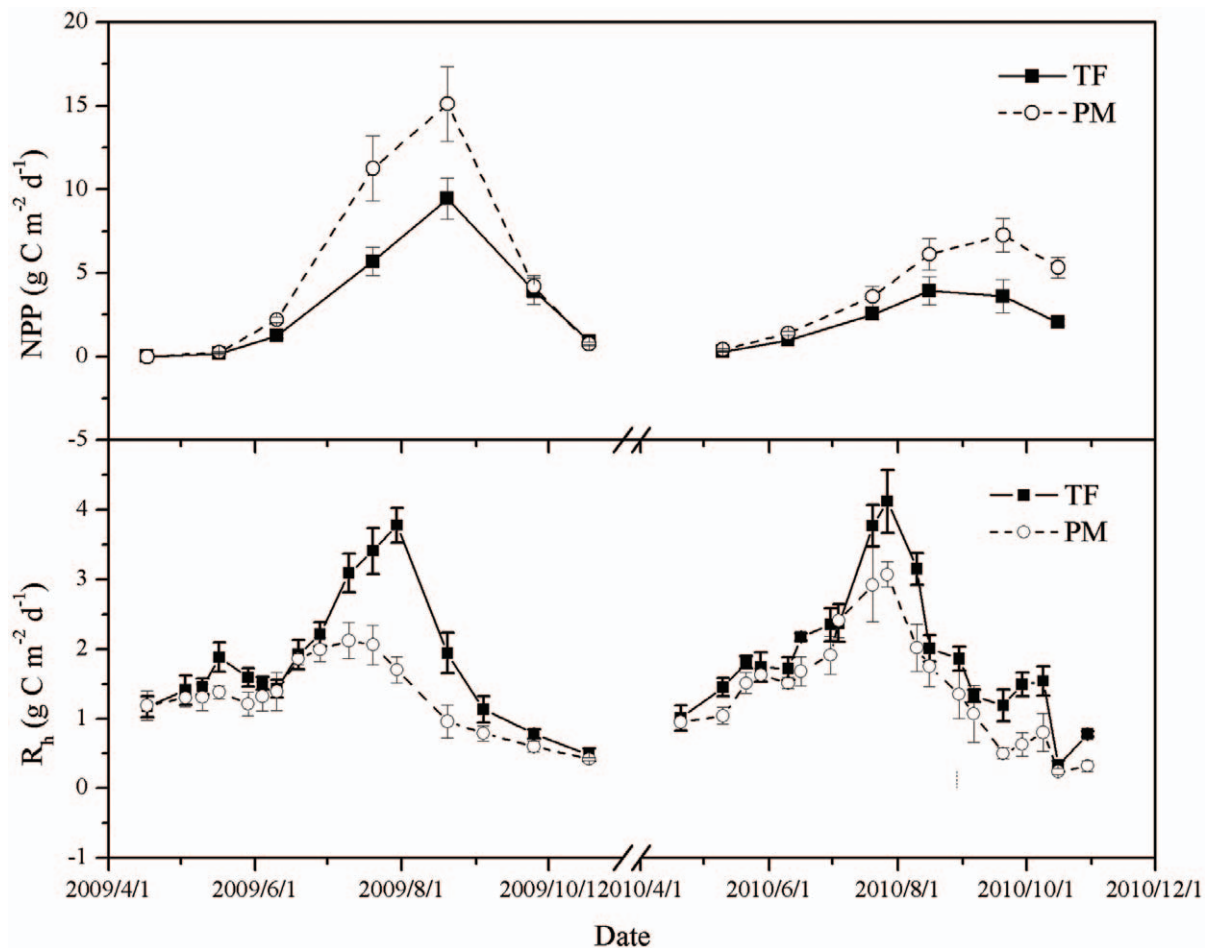

**Figure 2. Daily net primary productivity ( $NPP$ ) and heterotrophic respiration ( $R_h$ ) measured using a closed chamber at the PM site and the TF site in the cotton growing season of 2009 and 2010 (mean  $\pm$  SE).**

doi:10.1371/journal.pone.0050760.g002

### 3.3. Soil Respiration

Soil respiration also showed strong seasonal variations with occasionally high fluxes of  $2.12\text{--}4.12 \text{ g C m}^{-2} \text{d}^{-1}$  between July and August (Fig. 2). The average daily rate of  $R_h$  was  $1.86 \text{ g C m}^{-2} \text{d}^{-1}$  in the PM, significantly higher than the values of  $1.39 \text{ g C m}^{-2} \text{d}^{-1}$  in the TF ( $p < 0.05$ ). During the two growing seasons, the total soil  $\text{CO}_2$  flux in the PM was lower than that in the TF ( $485$  and  $663 \text{ g C m}^{-2}$ , respectively). Thus, the conversion from TF to PM caused a decrease in soil C emissions of approximately  $89 \text{ g C m}^{-2}$  in one growing season.

### 3.4. Growing Season NEP

Between years, the values of  $NEP$  from PM and TF varied largely owing to the large fluctuation of  $NPP$  for both sites. Comparing  $NEP$  from the two sites, PM was  $479$  and  $379 \text{ g C m}^{-2} \text{season}^{-1}$  higher than TF in 2009 and 2010 growing season, respectively. Over the two growing periods, PM had a net C uptake of  $1234 \text{ g C m}^{-2}$  and TF had a net C uptake of  $376 \text{ g C m}^{-2}$  from the atmosphere (Table 2).

**Table 1. Crop management details for the two cultivation systems in the cotton growing season of 2009 and 2010 ( $\pm$  standard deviation where computed,  $n=3$ ).**

| Treatment <sup>a</sup> | Year | Tillage date  | Planting date | Applied N ( $\text{kg N ha}^{-1}$ ) | Harvest date | Cotton yield ( $\text{Mg ha}^{-1}$ ) |
|------------------------|------|---------------|---------------|-------------------------------------|--------------|--------------------------------------|
| PM                     | 2009 | Dec.20, 2008  | Apr. 21, 2009 | 110                                 | Oct. 18      | $4.41 \pm 0.37$                      |
|                        | 2010 | Dec. 15, 2009 | Apr. 29, 2009 | 110                                 | Oct. 20      | $3.89 \pm 0.58$                      |
| TF                     | 2009 | Dec.20, 2008  | Apr. 21, 2009 | 110                                 | Oct. 18      | $3.34 \pm 0.64$                      |
|                        | 2010 | Dec. 15, 2009 | Apr. 29, 2009 | 110                                 | Oct. 20      | $2.85 \pm 0.23$                      |

<sup>a</sup>PM = plastic film mulching with drip irrigation; TF = non-mulching with flooding irrigation.

doi:10.1371/journal.pone.0050760.t001

**Table 2.** Carbon balance components for the PM and TF fields in the cotton growing season of 2009 and 2010 ( $\pm$ SD,  $n = 3$ ).

| Date           | Site | $NPP^a$ g C m $^{-2}$ | $R_h^b$ g C m $^{-2}$ | $NEP^c$ g C m $^{-2}$ |
|----------------|------|-----------------------|-----------------------|-----------------------|
| 2009.4–2009.11 | PM   | 1030 $\pm$ 155 a      | 214 $\pm$ 33 b        | 816 $\pm$ 49 a        |
|                | TF   | 648 $\pm$ 96 b        | 311 $\pm$ 29 a        | 337 $\pm$ 21 b        |
| 2010.4–2010.11 | PM   | 689 $\pm$ 97 a        | 271 $\pm$ 19 b        | 418 $\pm$ 15 a        |
|                | TF   | 391 $\pm$ 73 b        | 352 $\pm$ 32 a        | 39 $\pm$ 19 b         |
| Total          | PM   | 1719 $\pm$ 121 a      | 485 $\pm$ 31 b        | 1234 $\pm$ 72 a       |
|                | TF   | 1039 $\pm$ 78 b       | 663 $\pm$ 49 a        | 376 $\pm$ 49 b        |

<sup>a</sup> $NPP$  = net primary productivity;<sup>b</sup> $R_h$  = heterotrophic respiration;<sup>c</sup> $NEP$  = net ecosystem productivity; In a row, values with the different letters are significant different at 5% level based on Fisher's least significant difference tests.

doi:10.1371/journal.pone.0050760.t002

## Discussion

In cropland, improved practice can reduce net CO<sub>2</sub> emissions from soils and stabilize and/or increase C sequestration in the soil, and is being accepted as the best potential method to assist in meeting the demands of an international C credit system [1–4]. In this study, the consequences of modern and traditional cultivation management options for C fluxes were investigated using a plastic film mulching management with drip irrigation, versus a non-mulching management with flood-irrigation. It was assumed that all differences between the mulching and non-mulching cropland plots resulted from the contrast in management.

The  $NPP$  (g C dry matter produced per unit leaf area and time), referred to as the net CO<sub>2</sub> uptake by canopy, is a primary determinant of the C flux into the terrestrial biosphere [20]. PM significantly increased cotton  $NPP$  compared with TF, although the difference between PM and TF was smaller in the 2nd year owing to an insect pest infestation. This PM effect was also found in the earlier results for cotton in the Yellow River Delta China [21], and other crops such as wheat in New Delhi, India [22], and tomato in Mancha, Spain [23]. On the PM site, suitable soil conditions could be established with rational fertilizer use [24], high soil temperature and soil moisture [10], and better weed control [25], which could increase the photosynthetic capacity of crop leaves and lead to an increase in plant C content. Li *et al.* [11] and Chakraborty *et al.* [22] attributed the higher  $NPP$  in the PM to the improvement of water use efficiency compared with TF. The increase of water use efficiency in PM is reflected in two aspects: prolonging the soil water retention time in soil by reducing soil water evaporation, and exploiting deep soil water. These changes reduced the water stress, triggered deep rooting growth and improved plant photosynthesis, which resulted in the obvious increase in  $NPP$  at the PM sites. Liu *et al.* [26] and Li *et al.* [11] also reported that the higher soil temperature of PM, particular at early seedling growth, reduced cell damage from early season chilling and produced larger and more vigorous seedlings compared with TF, and these seedlings then sequestered more CO<sub>2</sub> from the atmosphere during the growth period.

Besides the obvious increase in  $NPP$  (C input), PM also changed soil CO<sub>2</sub> fluxes (C output). Conversion from PM to TF greatly altered soil environment factors such as temperature, plant and microorganism activity, and soil organic carbon content. These factors regulate soil CO<sub>2</sub> production through biochemical action, autotrophic and heterotrophic respiration [27,28], and other soil

properties such as soil water content and soil porosity, which affects the transfer of CO<sub>2</sub> in the soil profile [29]. In this study, the soil surface CO<sub>2</sub> flux was significantly lower in PM than in TF during the whole growth period. The result was opposite to what was expected, because previous studies reported that higher soil temperature and soil water content due to mulching increased soil respiration. The lower CO<sub>2</sub> in PM may be related to the soil properties. The soils in the present study sites were rich in calcium ions and had a high pH of 8.42 [30], together with a higher soil water content, which possibly led to a favorable soil environment for the formation of carbonate or organo-mineral complexes [31]. Moreover, mulching decreases wind disturbance, which can induce pressure pumping and vertical advection and increase rates of CO<sub>2</sub> exchange between soil and the atmosphere over and above rates permitted by molecular diffusion alone [32].

$NEP$ , an index of ecosystem function related to CO<sub>2</sub> uptake depends on two contrasting processes:  $NPP$  and  $R_h$ . Due to lower  $R_h$  than  $NPP$  in arid cropland, the mean  $NEP$  values of 188–617 g C m $^{-2}$  season $^{-1}$  in these cotton systems were both positive and much greater than those observed at forest sites (Borden forest, Ontario: 65–140 g C m $^{-2}$  [33]; European forest: 175 g C m $^{-2}$  [34]; Harvard forest, MA: 174 g C m $^{-2}$  [35]), and grassland sites ([northern temperate grassland in Alberta, Canada: –18 to 20 g C m $^{-2}$  [36]; Mediterranean annual grassland in California: –30 to 130 g C m $^{-2}$  [37]). As, we reported the  $NEP$  values with regard to single cotton growing season in this study, not surprisingly, the  $NEP$  values were higher than those reported on yearly basis in other studies. The growing season  $NEP$  values on the irrigated and rainfed maize sites at the University of Nebraska Agricultural Research and Development Center range from 600–800 g C m $^{-2}$ , which approach those of cotton in our study [38]. In addition, in this region, there is plenty of sunshine during growing season, and hence we used the high density cultivation mode. This mode could produce a higher level of  $NPP$ . These reasons eventually led to higher  $NEP$  than in other studies.

However, as a consequence of an increase in  $NPP$  and a relative reduction in  $R_h$  rates, PM showed a higher  $NEP$  (C sequestration potential) and sequestered an average of 429 g C m $^{-2}$  season $^{-1}$  more than TF. Similarly, Saroa *et al.* [39], Jia *et al.* [40] and Liu *et al.* [41] reported that net C content in soil significantly increased in soils following the initial conversion to PM. However, these results are in contrast with Zhang *et al.* [42], who measured significant net losses of SOC in PM soil due to accelerated decomposition of organic matter under the prevailing conditions of higher soil temperature and moisture. The different C content results after conversion to PM were probably due to differences in soil properties and crop species. In the present study, crop soils are rich in calcium ions, have a high pH (8.42) and have a lower SOC content [30], which provided conditions for the formation of carbonate or organo-mineral complexes [31]. Also, cotton has a larger biomass and deeper root systems that was more suitable for sequestering larger amounts of C into the soil profile [43,44].

Despite these analyses, mulching cultivation still has a relatively finite C sequestration potential. According to results reported by Li *et al.* [45] and Chen *et al.* [46], mulching increased the amount of CO<sub>2</sub> released from soil because the higher soil temperature accelerated the decomposition of soil organic matter. To improve the performance of C sequestration by the PM ecosystem, we suggest that the mulching cultivation system should be integrated with other highly advanced technological methods such as using no-till practices [47], planting biofuel crops with a greater biomass [48], adopting practices that encourage deep rooting of crops that allocate more C and nutrients deep into the soil profile [49] or

adding black biochar into the soil to fix more CO<sub>2</sub> from soil respiration.

## Conclusion

This study shows that conversion from mulching cultivation to non mulching cultivation in the short term increased the share of cotton *NPP* (C input) and decreased the soil surface CO<sub>2</sub> flux (C output) by ~30% for the whole growing season. As a consequence, there was a net increase of C in terms of *NEP* of ~429 g C m<sup>-2</sup> season<sup>-1</sup> after converting to PM cultivation. Nevertheless, to make the mulching cultivation sequester more C from the atmosphere

into the soil, it was suggested that other C fixing practices are used in conjunction with the mulching cultivation. Furthermore, in order to assess the overall greenhouse gases balance after the conversion from PM to TF, experimental measurements on N<sub>2</sub>O and CH<sub>4</sub> fluxes are needed.

## Author Contributions

Conceived and designed the experiments: ZGL XJW FC CYT. Performed the experiments: ZGL RHZ. Analyzed the data: ZGL XJW FC. Contributed reagents/materials/analysis tools: ZGL RHZ CYT. Wrote the paper: ZGL.

## References

- Johnson JMF, Franzluebbers AJ, Weyers SL, Reicosky DC (2007) Agricultural opportunities to mitigate greenhouse gas emissions. *Environmental Pollution* 150: 107–124.
- Desjardins RL, Smith W, Grant B, Campbell C, Riznek R (2005) Management strategies to sequester carbon in agricultural soils and to mitigate greenhouse gas emissions. *Climatic Change* 70: 283–297.
- Yan HM, Cao MK, Liu JY, Tao B (2007) Potential and sustainability for carbon sequestration with improved soil management in agricultural soils of China. *Agriculture Ecosystems & Environment* 121: 325–335.
- Paustian K, Six J, Elliott ET, Hunt HW (2000) Management options for reducing CO<sub>2</sub> emissions from agricultural soils. *Biogeochemistry* 48: 147–163.
- Li CF, Zhou DN, Kou ZK, Zhang ZS, Wang JP, et al. (2012) Effects of tillage and nitrogen fertilizers on CH<sub>4</sub> and CO<sub>2</sub> emissions and soil organic carbon in paddy fields of central China. *Plos One* 7: 1–9.
- Sperow M, Eve M, Paustian K (2003) Potential soil C sequestration on US agricultural soils. *Climatic Change* 57: 319–339.
- Vleeshouwers LM, Verhagen A (2002) Carbon emission and sequestration by agricultural land use: a model study for Europe. *Global Change Biology* 8: 519–530.
- Okuda H, Noda K, Sawamoto T, Tsuruta H, Hirabayashi T, et al. (2007) Emission of N<sub>2</sub>O and CO<sub>2</sub> and uptake of CH<sub>4</sub> in soil from a satsuma mandarin orchard under mulching cultivation in central Japan. *Journal of the Japanese Society for Horticultural Science* 76: 279–287.
- Ibarra-Jimenez L, Zermeno-Gonzalez A, Lozano-Del Rio J, Cedeno-Rubalcava B, Ortega-Ortiz H (2008) Changes in soil temperature, yield and photosynthetic response of potato (*Solanum tuberosum* L.) under coloured plastic mulch. *Agrochimica* 52: 263–272.
- Zhang SL, Lovdahl L, Grip H, Tong YN, Yang XY, et al. (2009) Effects of mulching and catch cropping on soil temperature, soil moisture and wheat yield on the Loess Plateau of China. *Soil & Tillage Research* 102: 78–86.
- Li FM, Wang J, Xu JZ, Xu HL (2004) Productivity and soil response to plastic film mulching durations for spring wheat on entisols in the semiarid Loess Plateau of China. *Soil & Tillage Research* 78: 9–20.
- Zhang ZC, Zhang SF, Yang JC, Zhang JH (2008) Yield, grain quality and water use efficiency of rice under non-flooded mulching cultivation. *Field Crops Research* 108: 71–81.
- He WP, Yan CR, Zhao CX, Chang RR, Liu Q, et al. (2009) Study on the pollution by plastic film mulch film and its countermeasure in China. *Journal Agro-Environment Science* 28: 533–538.
- Wang YG, Xiao DN, Li Y, Li XY (2008) Soil salinity evolution and its relationship with dynamics of groundwater in the oasis of inland river basins: case study from the Fubei region of Xinjiang Province, China. *Environmental Monitoring and Assessment* 140: 291–302.
- Liu WH, Zhao JZ, Ouyang ZY, Soderlund L, Liu GH (2005) Impacts of sewage irrigation on heavy metal distribution and contamination in Beijing, China. *Environment International* 31: 805–812.
- Lohila A, Aurela M, Regina K, Laurila T (2003) Soil and total ecosystem respiration in agricultural fields: effect of soil and crop type. *Plant and Soil* 251: 303–317.
- Bekku YS, Sakata T, Nakano T, Koizumi H (2009) Midday depression in root respiration of *Quercus crispula* and *Chamaecyparis obtusa*: its implication for estimating carbon cycling in forest ecosystems. *Ecological Research* 24: 865–871.
- Mosier AR, Delgado JA (1997) Methane and nitrous oxide fluxes in grasslands in western Puerto Rico. *Chemosphere* 35: 2059–2082.
- Kessavalou A, Mosier AR, Doran JW, Drijber RA, Lyon DJ, et al. (1998) Fluxes of carbon dioxide, nitrous oxide, and methane in grass sod and winter wheat-fallow tillage management. *Journal of Environmental Quality* 27: 1094–1104.
- Ju WM, Gao P, Zhou YL, Chen JM, Chen S, et al. (2010) Prediction of summer grain crop yield with a process-based ecosystem model and remote sensing data for the northern area of the Jiangsu Province, China. *International Journal of Remote Sensing* 31: 1573–1587.
- Dong HZ, Li WJ, Tang W, Zhang DM (2009) Early plastic mulching increases stand establishment and lint yield of cotton in saline fields. *Field Crops Research* 111: 269–275.
- Chakraborty D, Nagarajan S, Aggarwal P, Gupta VK, Tomar RK, et al. (2008) Effect of mulching on soil and plant water status, and the growth and yield of wheat (*Triticum aestivum* L.) in a semi-arid environment. *Agricultural Water Management* 95: 1323–1334.
- Moreno MM, Moreno A (2008) Effect of different biodegradable and polyethylene mulches on soil properties and production in a tomato crop. *Scientia Horticulturae* 116: 256–263.
- Gao YJ, Li Y, Zhang JC, Liu WG, Dang ZP, et al. (2009) Effects of mulch, N fertilizer, and plant density on wheat yield, wheat nitrogen uptake, and residual soil nitrate in a dryland area of China. *Nutrient Cycling in Agroecosystems* 85: 109–121.
- Ahmed ZI, Ansar M, Iqbal M, Minhas NM (2007) Effect of planting geometry and mulching on moisture conservation, weed control and wheat growth under rainfall conditions. *Pakistan Journal of Botany* 39: 1189–1195.
- Liu XJ, Wang JC, Lu SH, Zhang FS, Zeng XZ, et al. (2003) Effects of non-flooded mulching cultivation on crop yield, nutrient uptake and nutrient balance in rice-wheat cropping systems. *Field Crops Research* 83: 297–311.
- Billings SA, Ziegler SE (2008) Altered patterns of soil carbon substrate usage and heterotrophic respiration in a pine forest with elevated CO<sub>2</sub> and N fertilization. *Global Change Biology* 14: 1025–1036.
- Saito M, Kato T, Tang Y (2009) Temperature controls ecosystem CO<sub>2</sub> exchange of an alpine meadow on the northeastern Tibetan Plateau. *Global Change Biology* 15: 221–228.
- Reth S, Gockede M, Falge E (2005) CO<sub>2</sub> efflux from agricultural soils in Eastern Germany - comparison of a closed chamber system with eddy covariance measurements. *Theoretical and Applied Climatology* 80: 105–120.
- Xie JX, Li Y, Zhai CX (2009) CO<sub>2</sub> absorption by alkaline soils and its implication to the global carbon cycle. *Environmental Geology* 56: 953–961.
- Mi N, Wang SQ, Liu JY, Yu GR, Zhang WJ, et al. (2008) Soil inorganic carbon storage pattern in China. *Global Change Biology* 14: 2380–2387.
- Reicosky DC, Gesch RW, Wagner SW, Gilbert RA, Wente CD, et al. (2008) Tillage and wind effects on soil CO<sub>2</sub> concentrations in muck soils. *Soil & Tillage Research* 99: 221–231.
- Teklemariam T, Staebler RM, Barr AG (2009) Eight years of carbon dioxide exchange above a mixed forest at Borden, Ontario. *Agricultural and Forest Meteorology* 149: 2040–2053.
- Bellassen V, Viovy N, Luysaert S, Le Maire G, Schelhaas MJ, et al. (2011) Reconstruction and attribution of the carbon sink of European forests between 1950 and 2000. *Global Change Biology* 17: 3274–3292.
- Hollinger DY, Aber J, Dail B (2004) Spatial and temporal variability in forest-atmosphere CO<sub>2</sub> exchange (vol 10, pg 1689, 2004). *Global Change Biology* 10: 1961–1961.
- Flanagan LB, Wever LA, Carlson PJ (2002) Seasonal and interannual variation in carbon dioxide exchange and carbon balance in a northern temperate grassland. *Global Change Biology* 8: 599–615.
- Xu LK, Baldocchi DD (2004) Seasonal variation in carbon dioxide exchange over a Mediterranean annual grassland in California. *Agricultural and Forest Meteorology* 123: 79–96.
- Verma SB, Dobermann A, Cassman KG, Walters DT, Knops JM, et al. (2005) Annual carbon dioxide exchange in irrigated and rainfed maize-based agroecosystems. *Agricultural and Forest Meteorology* 131: 77–96.
- Saroa GS, Lal R (2003) Soil restorative effects of mulching on aggregation and carbon sequestration in a miamian soil in central Ohio. *Land Degradation & Development* 14: 481–493.
- Jia Y, Li FM, Wang XL (2006) Soil quality responses to alfalfa watered with a field micro-catchment technique in the Loess Plateau of China. *Field Crops Research* 95: 64–74.
- Liu CA, Jin SL, Zhou LM, Jia Y, Li FM, et al. (2009) Effects of plastic film mulch and tillage on maize productivity and soil parameters. *European Journal of Agronomy* 31: 241–249.
- Zhang GS, Chan KY, Li GD, Huang GB (2008) Effect of straw and plastic film management under contrasting tillage practices on the physical properties of an erodible loess soil. *Soil & Tillage Research* 98: 113–119.
- McMichael BL, Oosterhuis DM, Zak JC, Beyrouthy CA (2010) Growth and development of root systems. *Physiology of Cotton*: 57–71.

44. Tum M, Gunther KP (2011) Validating modelled NPP using statistical yield data. *Biomass & Bioenergy* 35: 4665–4674.
45. Li SQ, Li FM, Song QH, Wang J (2001) Effects of plastic film mulching periods on the soil nitrogen availability in semiarid areas. *Acta Ecologica Sinica* 21: 1519–1526.
46. Chen XS, Guo S, Wang JK, Zhang J (1998) Effect of mulching cultivation with plastic film on soil microbial population and biological activity. *Chinese Journal of Applied Ecology* 9: 435.
47. Sombrero A, de Benito A (2010) Carbon accumulation in soil. Ten-year study of conservation tillage and crop rotation in a semi-arid area of Castile-Leon, Spain. *Soil & Tillage Research* 107: 64–70.
48. Heaton E, Voigt T, Long SP (2004) A quantitative review comparing the yields of two candidate C-4 perennial biomass crops in relation to nitrogen, temperature and water. *Biomass & Bioenergy* 27: 21–30.
49. Bernacchi CJ, Hollinger SE, Meyers T (2005) The conversion of the corn/soybean ecosystem to no-till agriculture may result in a carbon sink. *Global Change Biology* 11: 1867–1872.
